## COVID-19 self-testing in Nigeria: Stakeholders' opinions and perspective on its value for case detection

1 **Veronica A. Undelikwo<sup>1</sup>, Sonjelle Shilton<sup>2\*</sup>, Morenike Oluwatoyin Folayan<sup>3</sup>, Oluwatoyin**  
2 **Alaba<sup>4</sup>, Elena Ivanova Reipold<sup>2</sup>, Guillermo Z. Martínez-Pérez<sup>2</sup>**

3 <sup>1</sup>Department of Sociology, University of Calabar, Calabar, Cross River State, Nigeria

4 <sup>2</sup>FIND, the global alliance for diagnostics, Geneva, Switzerland

5 <sup>3</sup>Department of Child Dental Health, Obafemi Awolowo University, Ile-Ife, Osun State, Nigeria

6 <sup>4</sup>Institute of Public Health, Obafemi Awolowo University, Ile-Ife, Nigeria

7 **\* Correspondence:**

8 Sonjelle Shilton

9 [sonjelle.shilton@finddx.org](mailto:sonjelle.shilton@finddx.org)

10 **Keywords: Nigeria, COVID-19, Community representatives, Self-testing, Diagnostics,**  
11 **Qualitative research.**

12 **Word count: 5440**

13

14 **Abstract**

15 **Background**

16 COVID-19 testing coverage is limited in Nigeria. Access to SARS-CoV-2 self-testing kits may help  
17 improve the detection of asymptomatic and mildly symptomatic cases and increase the currently low  
18 rate of COVID-19 testing in the country. Before implementing SARS-CoV-2 self-testing in Nigeria,  
19 it is imperative to assess the populations' perceptions regarding this innovation. We therefore  
20 conducted a qualitative study to investigate people's values and preferences for SARS-CoV-2 self-  
21 testing in Nigeria.

22 **Methods**

23 We used semi-structured interviews and focus group discussions among healthcare workers,  
24 community representatives, and public health implementors to explore values and perceptions around  
25 various aspects of COVID-19 testing, including conventional COVID-19 testing, SARS-CoV-2 self-  
26 testing, the safe and effective use of SARS-CoV-2 self-testing, actions upon receiving a positive  
27 SARS-CoV-2 self-test result, and future prospects for SARS-CoV-2 self-testing.

28 **Results**

29 Respondents reported that there is limited availability of conventional SARS-CoV-2 testing in  
30 Nigeria. While just a few respondents were familiar with SARS-CoV-2 testing, respondents generally  
31 supported the use of SARS-CoV-2 self-testing as they felt it could assist with early case detection  
32 and improve access to testing. Concerns relating to the use of SARS-CoV-2 self-testing were majorly  
33 about the ability among low literacy populations to use and interpret the test, the affordability of  
34 tests, equity of access, and the availability of healthcare system support for those who test positive.

35 **Conclusion**

36 Though the public perceive multiple benefits associated with access to SARS-CoV-2 self-testing, the  
37 efficiency of the national health service delivery system may limit access of the users of the kits to  
38 psychosocial and clinical support. In Nigeria, where COVID-19 vaccine coverage is low and the risk  
39 of further waves of COVID-19 is high, self-testing may assist in the prompt detection of cases and  
40 contribute to halting the spread of the virus.

41

42

## 43 1 Introduction

44 Coronavirus disease 2019 (COVID-19) is a novel disease that has caused a global pandemic,  
45 resulting in more than 332 million infections and 5.5 million deaths in January 2022 (1). It is an  
46 airborne, respiratory infection that is easily transmissible between individuals. Although vaccines  
47 against COVID-19 can reduce the severity of infection, they do not eliminate the risk of infection or  
48 transmission of the infection (2). There is a need for sustainable COVID-19 containment strategies to  
49 halt its transmission, especially in low- and middle-income countries (LMICs), where COVID-19  
50 vaccine coverage remains low and the risk of multiple further waves of the pandemic is high (3).

51 One effective strategy to help contain COVID-19 is community-wide testing to enable prompt  
52 detection of cases. The most accurate technology for the detection of SARS-CoV-2, real-time reverse  
53 transcription polymerase chain reaction (RT-PCR), can determine whether a person is currently  
54 infected with SARS-CoV-2 (4). However, LMICs have few RT-PCR-equipped laboratories, and  
55 limited resources to provide essential reagents (5). To facilitate community-level case identification,  
56 rapid antigen tests, in the form of lateral flow assays, represent a low-cost, portable, and easy-to-  
57 perform solution for LMICs, although they are less sensitive than RT-PCR. Multiple asymptomatic  
58 cases of COVID-19 may go undetected (6). To reduce this risk, self-tests for serial or frequent home-  
59 use enable people to test self-collected specimens and detect SARS-CoV-2 infection without the  
60 direct assistance of healthcare professionals (7, 8). While not yet widely introduced in most LMICs,  
61 the commercialization and distribution of SARS-CoV-2 self-tests has already been approved across  
62 Canada (8), the United States (9), and India (10).

63 In some LMICs, self-administered rapid HIV, malaria, and syphilis tests are already widely used (11-  
64 15). The World Health Organization (WHO) has recently released recommendations for hepatitis C  
65 self-testing (16). The acceptability of self-testing among the general population is usually high, as  
66 these approaches can help to ensure higher levels of confidentiality, they are usually more affordable  
67 and accessible, and they guarantee freedom of choice of testing location (13, 17). As with other self-  
68 testing devices, self-testing for SARS-CoV-2 may be a feasible solution to resource-constrained  
69 governments' lack of capacity to carry out mass screening for COVID-19, provided there are clear  
70 pathways to ensure self-testing users can access treatment and can isolate when needed.

71 In Nigeria, the country in West Africa worst affected by the COVID-19 pandemic (18), the concept  
72 of individuals having access to technologies for self-testing for infectious diseases is not new. The  
73 acceptability of HIV self-testing is high (19-21), although its use is not yet widespread, and so is the  
74 acceptability of malaria self-testing by the general public (22) and healthcare workers (23). Access to  
75 SARS-CoV-2 self-testing kits may help increase the prompt detection of infection in asymptomatic  
76 and mildly symptomatic cases and improve the currently low rate of COVID-19 testing in the  
77 country (24). It could also reduce the resistance to seeking care that results from the stigma  
78 associated with COVID-19 infection (25).

79 To develop and issue recommendations for regulatory and public health practice around SARS-CoV-  
80 2 self-testing in Nigeria, it is imperative to conduct a thorough assessment of the population's  
81 perceptions regarding the innovation, as this can provide insights into socio-culturally acceptable  
82 strategies for implementing self-testing, helping to address any barriers and accelerating its  
83 widespread use. We therefore conducted a qualitative research study to investigate the values and  
84 preferences of the general population around SARS-CoV-2 self-testing in Nigeria.

## 85 2 Methods

## 86 **1.1 Study Design and Site**

87 For this qualitative inquiry we used semi-structured interviews (SSIs) and focus group discussions  
88 (FGDs). The study was conducted in Nigeria by the Institute of Public Health, Obafemi Awolowo  
89 University, Ile-Ife with the support of FIND. This was an ancillary study to a larger, population-  
90 based survey conducted in Nigeria between July and September 2021, which assessed the general  
91 public's values and acceptance around SARS-CoV-2 self-testing (hereafter referred to as "self-  
92 testing") (26).

### 93 **2.1 Population and Sampling**

94 The study population comprised three groups of stakeholders who hold decision-making capacities  
95 for the future usage of self-testing. Healthcare workers (HCWs) were targeted because of their  
96 capacity to recommend (or not recommend) the use of self-testing to their patients. Representatives,  
97 or spokespersons, of various civil society communities (RCSs) were targeted because of their  
98 capacity to influence community decision-making on the utility of self-testing and guide people on  
99 what to do following a reactive self-test result. Potential COVID-19 self-testing implementers (PIs)  
100 were targeted because of their capacity to decide to pool financial and human resources to procure  
101 and distribute self-testing at scale, for example in the workplaces they managed or in the geographies  
102 where they had jurisdiction to regulate or operate. Common inclusion criteria for all populations  
103 were: aged 18 years or more, willing to provide informed consent, and fluent in English or could  
104 communicate in broken English.

105 Efforts were made to ensure maximum variation in sampling in terms of gender, urban and rural  
106 workplaces, and professional and institutional profiling. To ensure a diversity of voices was  
107 represented in the sample, a purposive sampling approach was used. Sex-disaggregated lists of at  
108 least 50 profiles per study population were produced. To avoid sampling by convenience, these lists  
109 were randomly rearranged by FIND staff using the RANDOM.Org<sup>®</sup> randomizer. The interviewers  
110 contacted potential informants by phone, starting with the first name on each list. Potential  
111 informants were provided with information about the study's aim and procedures, and those who  
112 expressed an interest in participating were asked to partake in either an SSI or an FGD.

### 113 **2.2 Data Collection and Processing**

114 All informants gave their informed consent. Depending on the informants' expressed preferences,  
115 data collection was conducted either using Zoom<sup>®</sup> teleconferencing software or in-person at a  
116 designated place convenient for the informant and the interviewer. Each informant chose the  
117 language in which the interview was to be conducted.

118 The data collection was led by a team of research assistants with qualitative research experience. The  
119 same 45-item structured guide was used for SSIs and FGDs. The guide included questions around six  
120 main topics: knowledge of conventional COVID-19 testing; values around self-testing; the public's  
121 preferences for the delivery of self-testing; safe and effective use of self-testing; actions taken upon  
122 receiving a reactive self-test result; and future prospects for the distribution of self-tests (26). The  
123 interviewers posed the 45 questions to the informants in the same order and probed them further  
124 depending on the nature of their responses.

125 All encounters were audio-recorded. Zoom<sup>®</sup> encounters were not video-recorded. The recordings  
126 were transcribed verbatim into MS-Word<sup>®</sup> files. Responses not in English were translated into

127 English. All transcripts and translated sections within the transcripts were cross-checked by the  
128 analysts (VAU, OA, MOF) against the recordings, for accuracy and completeness.

### 129 **2.3 Data Analysis**

130 Transcripts were uploaded into Quirkos<sup>®</sup> software, and a thematic comparative analysis was applied.  
131 First, all transcripts were deductively coded using a pre-defined coding scheme (26). Whenever an  
132 emerging theme was identified, new codes were inductively created. In parallel with the coding, the  
133 analysts prepared reflexive memos to control for the risk of informant bias.

134 Iteratively with the coding, the dataset was analyzed using a four-stage approach: Transcript by  
135 transcript at first; followed by a theme-by-theme, sex-sensitive comparison of coded narratives across  
136 all transcripts and then by a theme-by-theme rural versus urban-sensitive comparison of coded  
137 narratives across all transcripts; and finishing with a trans-study population comparison of key  
138 findings.

139 The reports were prepared taking into consideration general insights as well as insights from isolated  
140 or deviant cases. The informants' own words were used to prepare the report. Attention was paid to  
141 the memos to ensure that no analysts' informant biases were being introduced. The COREQ  
142 guidelines were considered.

### 143 **2.4 Ethics Approval**

144 This study received ethics approval from the Health Research Ethics Committee of the Obafemi  
145 Awolowo University in Ile-Ife (Ref. IPH/OAU/12/1730). All informants signed an informed consent  
146 form and received a copy. Prior to any data collection, the informed consent forms were shared by  
147 email with the respective informants to give them more time to make an informed decision about  
148 their participation. Participants who attended the in-person FGDs were compensated for their  
149 transportation costs. As per criteria set during the informed consent process, the transcripts of  
150 participants' encounters with the interviewers were not shared with any person outside of the  
151 research team.

## 152 **2 Results**

### 153 **2.5 Participants' Characteristics**

154 Two FGDs and ten SSIs were conducted with each of the three study populations. On average, the  
155 FGDs and SSIs lasted for 55 minutes and 122 minutes, respectively. A total of 58 informants (29  
156 female) participated (Supplementary Material 1). Half of the informants were either living and/or  
157 working in rural Osun State. The mean age of informants was 45 years. Most participants (55) had  
158 completed tertiary education (diploma, bachelors, or masters). Among the 19 HCWs, 5 were nurses.  
159 There was diversity in terms of the institutional representation of PIs and RCSs. To protect their  
160 anonymity, demographic information highlighted in Supplementary Material 1 only indicates their  
161 socio-professional sector of influence.

162 The findings are presented as per the four core themes included in the analysis process, namely:  
163 uptake of conventional COVID-19 testing; values around SARS-CoV-2 self-testing; safe and  
164 effective use of self-testing; and future prospects for the delivery of self-testing. Unless otherwise  
165 specified, the voices reported below were common across the three study populations.

### 166 **2.6 Uptake of Current COVID-19 Testing Modalities**

167 Access to conventional facility-based testing was described as being of most interest to travelers and  
168 symptomatic patients. Testing was not considered to be in great demand for case detection among  
169 mildly symptomatic people. Several deterrents to testing for the general public were identified,  
170 including the high cost, frequent delays to receive test results, a generalized perception that COVID-  
171 19 was low-risk, and a fear of isolation and being “stigmatized”. Walk-in visits to health facilities to  
172 demand testing by members of the community was described as limited because communities were  
173 perceived as either “poorly educated” about COVID-19 symptoms, lacking in “motivation” to  
174 request tests, or were unable to afford them.

175 *It has to do with the early stigmatization. Once someone is tested positive to COVID-19, the society*  
176 *and even the immediate family discriminates against him, and this has been a contributory factor for*  
177 *discouraging people to go and test. (SSI 26, rural male PI)*

178 Among other reasons given for the low demand for testing was the suggestion that “disbelief” about  
179 COVID-19 was commonplace and that there were misconceptions about COVID-19 being  
180 synonymous with malaria:

181 *Many people still believe that COVID does not exist, that is just like malaria and that they don't have*  
182 *to go for testing because if they are being diagnosed of COVID: that maybe is a death sentence, that*  
183 *they have to isolate them. As you know, isolation is like you are taking them away from their family,*  
184 *from their home. (SSI 19, urban female HCW)*

185 HCWs noted that the detection of early infections is difficult as most people present to health  
186 facilities at an advanced stage of the disease. Additionally, all study groups perceived there to be a  
187 dearth of clinic- or laboratory-based testing sites. Most HCWs expressed that they were not involved  
188 with COVID-19 testing and emphasized that the scarcity of diagnostic centers, together with facility  
189 staff being too busy caring for patients, limit the healthcare system’s capacity for community-based  
190 case detection. The shortage of trained professionals to conduct COVID-19 testing, poor availability  
191 of COVID-19 diagnostics, and limited access to personal protective equipment were other limiting  
192 factors for the routine testing of symptomatic patients and their contacts. The RCSs also mentioned  
193 language barriers, lack of privacy, poor safety, and low wages as barriers for healthcare workers to  
194 conduct community-based testing.

195 All informants who had direct (e.g., collection of nasal or blood samples) or indirect (e.g., being a  
196 member of the State’s COVID-19 committee) experience of testing resided or worked in an urban  
197 area. None of the informants from rural areas reported any type of experience with COVID-19 testing  
198 and hence, as many of them reflected, lacked factual knowledge in relation to testing sites,  
199 techniques, and operators. While the HCWs were aware that COVID-19 could be diagnosed using  
200 rapid antigen testing, many RCSs and PIs could not explain in any detail what diagnostic  
201 technologies for COVID-19 were available in their contexts.

## 202 **2.7 Value of SARS-CoV-2 Self-testing**

203 Of all the informants, just three HCWs were aware of self-testing. They had learned about it through  
204 the social media, CNN and Al Jazeera, and an international journal. Despite the general lack of  
205 knowledge around self-testing, most informants had an opinion on its potential advantages. Self-  
206 testing was perceived to be an innovation that would help end-users reduce costs, time, and other  
207 resources necessary to access COVID-19 diagnostic centers. It was defined as a potentially private,  
208 convenient, and easy way to obtain a prompt diagnosis of SARS-CoV-2 infection, to facilitate access  
209 to early treatment and, as a consequence, to reduce COVID-19-attributable mortality. It was also

210 noted, especially by the HCWs, that the workload and “stress” among health facility personnel would  
211 be reduced. Special emphasis was placed on the assertion that the confidentiality of self-testing  
212 results would help some end-users overcome their fear of stigma:

213 *One advantage is it will make the detection of the disease very easy, because it could actually serve*  
214 *as a facilitator because people will prefer to do the test themselves in the comfort of their homes*  
215 *instead of going out to health facility and then everybody starts looking at them and thinking that*  
216 *“does this person have COVID-19 or not?”* (SSI 5, rural female RCS)

217 Some potential disadvantages, more related to the idea of self-testing among specific end-users than  
218 to the technology itself, were also identified. As per the informants’ narratives, some end-users,  
219 especially populations with low levels of literacy, may be less able to correctly interpret the results.  
220 The possibility of obtaining invalid results due to poor compliance with the test’s instructions was  
221 also frequently mentioned. It was suggested that some end-users may self-medicate or may deny a  
222 positive result and thus refuse to seek medical treatment.

223 Although there was consensus that the availability of self-testing in Nigeria may improve public  
224 interest in COVID-19 testing, it was also suggested that it would be mainly travelers who may prefer  
225 to use self-testing to avoid the “stress of doing a PCR”, that the “elites” would be among the first to  
226 use them as they have more information and resources to obtain them, and that urban dwellers will  
227 show more interest in self-testing than their rural counterparts. The HCWs further perceived that  
228 various cadres of healthcare professionals may themselves benefit from the regular use of self-testing  
229 if they are exposed to COVID-19 in the workplace.

230 The majority of informants stated they would recommend self-testing as they considered it could lead  
231 to early commencement of treatment for those who might need it, and of measures to avoid further  
232 transmission of the virus. Some HCWs also expressed that they would be keen to recommend self-  
233 testing to their communities, as this could help alleviate their daily workload in healthcare facilities.

234 The informants’ likelihood of recommending self-testing, however, might also be influenced by  
235 factors such as price, ease of use, availability, and accuracy. To ensure ease of use, step-by-step  
236 instructions for the use of self-test kits should be provided in English, Igbo, Hausa, and Yoruba.  
237 Some RCSs and PIs noted that user instructions should also be provided in Braille. Information  
238 suggested for inclusion in the instructions included: how to unpack, use, and dispose of the kit; how  
239 to read and interpret the result; what the time interval before a repeat test should be; and what to do if  
240 the result is positive. As one PI elaborated, if the kits are designed with full consideration of the  
241 country’s low-literacy levels, most self-test end-users will be able to perform the test, in the same  
242 way that diabetes patients with low literacy levels are able to use their glucose monitoring devices:

243 *Glucostix is there and it is graded in different color codes. That is the sort of thing to be done, so that*  
244 *even an illiterate, someone who is not educated, know that the moment you see red, it means danger.*  
245 *So, you don’t need to put figures there. You can use color codes.* (SSI 22, urban female PI)

246 To tackle the likely barrier of unaffordability for a large proportion of the Nigerian populace, a few  
247 PIs and all RCSs opined that self-testing kits should be delivered free-of-charge. Conversely, some  
248 HCWs, PIs, and RCSs opposed the free distribution of kits on the premise that the public “do not  
249 value what is free”. If the devices had to have a market price, the preferred maximum cost expressed  
250 by RCSs and PIs was Naira (N) 250 and N500, respectively (N100 is approximately US\$0.25).  
251 HCWs held the most varied views, with some suggesting pricing ranging between N100 and N500  
252 and others suggesting pricing ranging between N1000 and N2500.

253 Regarding availability, it was suggested that a range of stakeholders from the public (e.g., healthcare  
254 workers), private not-for-profit (e.g., non-governmental organizations, NGOs; civil society  
255 organizations, CSOs), and private for-profit (e.g., pharmacies, patent medicine vendors) sectors  
256 should be engaged with the distribution of the kits. As per the informants' suggestions, kits could be  
257 made available in hospitals, churches, mosques, football fields, cinemas, barbing salons, or through  
258 NGO/CSO community and house-to-house outreach programs.

259 With regard to accuracy, and as claimed by some of the HCWs partaking in the FGDs, their  
260 likelihood to recommend self-testing would be conditional on the kits clearly indicating that they had  
261 been approved by the National Agency for Food and Drug Administration and Control (NAFDAC,  
262 see: <https://www.nafdac.gov.ng/>). The public's preferred test specimens would be sputum, urine, and  
263 saliva; blood collection was considered to be too invasive, as it would require a professional to  
264 perform it and was thus the least preferred specimen.

265 *People are beginning to clamor for non-invasive procedures. I would love a situation whereby the*  
266 *use of saliva can be explored. Everybody spits all over the place, so we shouldn't... Now what we are*  
267 *doing is a throat swab and everything, but if you have done that testing... you would know that "oh*  
268 *my God!" Especially the nasal one, it's painful. (SSI 22, female urban PI)*

## 269 **2.8 Safe and Effective Use of COVID-19 Self-Testing**

270 While some RCSs and HCWs opined that there were no circumstances under which access to self-  
271 testing should be restricted, others challenged this perspective. Some PIs were of the opinion that  
272 minors should have limited access to self-testing. An urban, female PI thought that access to self-  
273 testing should be limited when there is "no longer an upsurge in infection rates" and the perception of  
274 risk associated with COVID-19 is low. Some RCSs expressed that self-testing should be restricted if  
275 the distributors start "hoarding the kit among themselves" or if there is any security risk such as  
276 "kidnapping (of people distributing the kits)". Some HCWs added that, to avoid misinterpretation of  
277 results or use of expired kits, elderly persons living alone and individuals of any age with limited  
278 literacy should have limited access to self-testing.

279 Although all informant groups were clear that an indicator of success of self-testing could be end-  
280 users' communication of their results to health authorities, all groups insisted that a fear of death,  
281 isolation, and stigma were reasons for potential under-reporting. The HCWs also noted that people's  
282 concerns about health facility-induced stress, resulting from being passed through multiple  
283 departments to receive COVID-19 care, could also be a driver of under-reporting.

284 It was noted that isolation for those who receive a positive self-test result might be feasible for the  
285 "elites". Isolation was perceived to be dreaded by most Nigerians and especially by those of "low  
286 socio-economic status who live in crowded spaces". For many families it is simply impossible to  
287 isolate for 10 to 14 days unless they receive support from an NGO/CSO or, as some PIs emphasized,  
288 direct financial support. Despite isolation being a measure recommended by health authorities, the  
289 HCWs expressed empathy and understanding of the reasons why members of the public might not  
290 comply with this.

291 *They may wish to isolate but circumstances may not allow them. Like, if they are sharing rooms with*  
292 *members of their family, if they are not living in personal environment, they may not be able to*  
293 *isolate. So, the only thing they can do is for them to just protect themselves, or use their face mask,*  
294 *and they should ensure the people around them use their face mask. (FGD 4 with urban HCWs)*



295 Individuals' non-compliance with isolation following a positive COVID-19 result was not the biggest  
296 concern for many of the informants. Some HCWs thought that although some people may use self-  
297 testing and refuse to disclose a positive result, there was still a likelihood that they would take all  
298 possible precautions not to infect others. Other RCSs and PIs opined that some end-users would not  
299 report a positive result to a healthcare facility because they would want to manage the disease  
300 themselves. One RCS noted that he would simply communicate at work that he was "ill" and would  
301 also warn and protect his family members, but he would not report his COVID-19 status.

302 *Some [people] working with private organization don't want to take permission to be off work*  
303 *because stigmatization is there too. Once they hear that you are positive for whatever, they will ask*  
304 *you to "Just stay at home and don't even bother to come back again". (FGD 4 with urban HCWs)*

305 Individuals who perceive that a positive result "means death" may be at risk of psychosocial ill  
306 health, while "resilient" individuals may be more likely to react in way that protects others. The  
307 impact of a positive result on an individual will depend on their "personality", level of education, and  
308 location of residence. The breadwinners in a household and people with co-morbidities might be  
309 particularly concerned about the impact receiving a positive test result might have. To some  
310 informants, the "common man" does not perceive COVID-19 to be "fatalistic", and it is mostly the  
311 "elites" that are more afraid. Women were thought to be able to react more positively to a positive  
312 result than men and young people who, as per some informants' opinions, have generally poorer  
313 health-seeking behaviors than women.

314 Irrespective of personal attributes, most informants believed that many individuals might be  
315 "psychologically disturbed" after receiving a positive result. The impact might manifest in the form  
316 of avoiding people, not going out, becoming "depressed", suffering from insomnia, losing the ability  
317 to concentrate, or feeling "lonely" and "afraid of the unknown".

318 *The person is going to test himself or herself, and then of course [is going to] know the result alone,*  
319 *which gives some confidentiality. However, the disadvantage is that it can lead to some mental*  
320 *issues, like depression and possibly suicidal tendency if not properly managed. (SSI 23 with urban*  
321 *male PI)*

322 There was consensus that a supportive environment may mitigate this impact. If end-users received  
323 pre- and post-test counseling, they would be "psychologically prepared" for a positive result. A few  
324 HCWs suggested that end-users be counseled on the use of a self-test before receiving it. All groups  
325 stressed the need for sustained public education and sensitization through outreach activities and  
326 seminars carried out through churches, mosques, social media, and television and radio broadcasts.  
327 NGOs/CSOs could play a key role in the dissemination of information at a community-level. A key  
328 action to mitigate the risk of psychosocial harm would be to make clear to end-users, in the kits'  
329 written instructions, that effective linkage to COVID-19 care will occur should they receive a  
330 positive self-test result.

## 331 **2.9 Future Prospects for SARS-CoV-2 Self-Testing**

332 All groups expressed the opinion that treatment provision and contact-tracing following an end-user  
333 self-reporting in a clinic might be difficult due to a lack of adequate human and logistical resources.  
334 To prevent the public becoming disappointed with self-testing, the health sector must be strengthened  
335 by increasing the number of staff in healthcare facilities to cater for the volume of clients who might  
336 attend for the management of a COVID-19 infection following self-testing. Other steps should  
337 include improving health facilities' existing staff capacity to manage cases effectively, irrespective of

338 their severity; providing personal protective equipment to all staff tasked with direct management of  
339 cases; and increasing the number of facilities closer to the community, where end-users could both  
340 report a positive result and receive clinical care. PIs and RCSs identified the need for closer  
341 collaboration between healthcare workers and the community, including community development  
342 workers, to ensure that users of self-tests receive an appropriate response.

343 Other barriers to be addressed prior to the distribution of self-tests included the possible inability of  
344 end-users to afford the kits; anticipated poor distribution and unequal accessibility to the kits  
345 throughout the country; poor awareness about the availability of kits; and the likelihood of  
346 “hoarding” or stock-outs of self-test kits. To address these barriers, it was proposed that the kits  
347 should be rendered affordable through government subsidy, accessible from medical supply outlets in  
348 all communities, and introduced to the population following provision of adequate public education.

349 To promote community uptake of self-testing, community mobilization could be sustained using both  
350 printed and web-based social media. The “fear of death” should not be used in promotional messages.  
351 Rather, public messaging should emphasize “responsibility to care”. Some RCSs suggested that  
352 acceptability among the public may improve if, during public education efforts around self-testing,  
353 the government does not promote any “insinuation” that efforts promoting COVID-19 self-testing are  
354 for “ulterior motives” (i.e., in reference to possible suspicions that government officials may be  
355 profiting from the introduction of self-testing in their communities). The PIs noted that uptake could  
356 be promoted if opportunities for vaccination and treatment were concurrently provided at self-testing  
357 distribution points, with simultaneous national policies mandating regular self-testing in work  
358 environments.

### 359 **3 Discussion**

360 This study harnessed the opinions of critical stakeholders who would be involved in the rollout of  
361 SARS-CoV-2 self-testing in Nigeria. These stakeholders included representatives of communities  
362 who might become the potential end-users of self-testing; healthcare workers who might advise  
363 community members on self-testing access and usage; and implementers from the private and public  
364 sectors who have access to resources, make decisions in relation to the rollout of self-testing, and are  
365 in a position to support the country’s continued access to self-testing kits and post-testing care. There  
366 was consensus across all three groups that self-testing would be of considerable value in helping to  
367 overcome some of the current individual-, health system-, and community-level barriers to ensure  
368 access to and benefit from conventional healthcare facility-based COVID-19 testing. Nevertheless,  
369 the uptake and use of self-testing was not perceived to be free of challenges. To overcome any  
370 potential risks associated with the misinterpretation of results, misuse of kits, or under-reporting of  
371 reactive results, the informants also proposed strategies to promote the uptake of self-testing in a  
372 viable way and to guarantee counseling and healthcare provision to those whose self-test result is  
373 positive for SARS-CoV-2.

374 One of the values of self-testing identified by our informants was that it may reduce the burden on  
375 overstretched healthcare facilities. Self-testing offers opportunities for asymptomatic individuals or  
376 those with a mild case of infection to either rule out the possibility of having a SARS-CoV-2  
377 infection or to seek care only in the event of a reactive result. In any case, plans must be instituted to  
378 accommodate a likely increase in the number of self-testers that may visit their nearest clinic  
379 requesting confirmatory testing and specialist care. The risk of further burdening the healthcare  
380 system can be reduced if plans are made to scale-up facilities’ capacity to respond to any increase in  
381 self-test-diagnosed cases prior to any rollout of self-testing.

382 Some of the structural barriers identified for facility-based COVID-19 testing, such as the cost of  
383 healthcare, unavailability of diagnostics and therapies, and rejection of the “diseased” by certain  
384 sections of the public, might affect the uptake of self-testing if left unaddressed. The cost of  
385 healthcare already hampers the uptake of and adherence to HIV services (27) and preventive care  
386 (28), and it is a critical consideration for provision of laboratory services (29). The informants  
387 suggested that self-testing devices should be subsidized, although concern was expressed by some  
388 that the cost of isolation might be a greater worry than the cost of self-testing.

389 Concerns about “hoarding” and stock-outs were expressed in our study. For future implementation of  
390 self-testing, it will be important to identify which distribution and accountability models will be the  
391 most cost-effective in making self-testing available (and affordable) in areas where the communities  
392 have concerns regarding the governance of health product supplies. As hinted by some informants,  
393 NAFDAC could make a key contribution, by passing stringent regulations on self-test distribution  
394 and quality assurance, to mitigate the risk of unavailability of quality self-test kits throughout  
395 Nigeria.

396 In determining the most cost-effective models for the distribution of self-tests, other emotion-related  
397 factors interact with cost and the regulatory framework. The psycho-emotional burden of receiving a  
398 positive self-test result must also be considered. As with HIV infection, COVID-19 infection is  
399 associated with stigma (30), which implies that for distribution models to be cost-effective they must  
400 include provisions to mitigate the fear of being stigmatized for having COVID-19 and, as a  
401 consequence, incurring social and economic loss or deprivation. In the absence of provision of  
402 psychosocial support and clear pathways for linkage to post-self-test care, even the best distribution  
403 models may fail. Our study emphasizes the need for pre- and post-self-test counseling provision, as  
404 well as for the engagement of various stakeholders from the public and private not-for-profit  
405 healthcare provision sectors, to support provision outside of the regular healthcare system.

406 The stress associated with the possibility of isolation must be acknowledged and addressed as one of  
407 the most impactful impediments to testing as a whole, professional use or self-test. This is a  
408 reasonable concern for many men who are burdened with the need to provide care for their family as  
409 the sole bread winner in many households, as well as for many women who work in the informal  
410 economy and rely on their daily wages to provide for their children (31). In a country with sections of  
411 the population severely affected by high rates of malnutrition and extreme poverty, a debate is  
412 urgently needed on which measures would be the most effective, and acceptable to both society and  
413 health authorities, to ensure that people who are infected who cannot isolate will not transmit SARS-  
414 CoV-2 to others.

415 Isolation seemed to be a greater concern than fear of morbidity. This study did not provide an  
416 understanding on why there might be a low perception of risk (i.e., individuals’ judgments about and  
417 evaluations of hazards to which they may be exposed) for COVID-19 disease among some Nigerians  
418 though a prior study has made some suggestions. This low perception of risk is also a barrier to the  
419 use of self-testing. Nevertheless, what this study has identified is the need to tailor appropriate risk  
420 communication and education to enable individuals to understand their risks (32), when resorting to  
421 malaria treatment in the absence of either a malaria or a COVID-19 test, or self-managing a COVID-  
422 19 infection without having at least warned their relatives and other close contacts.

423 Gender norms are another structural factor that cannot be transformed in the short-term and that may  
424 affect self-testing usage. Self-testing distribution models must include targeted strategies to  
425 encourage the uptake of self-testing by men and adolescents who, as per our respondents’ voices, are

426 perceived to exhibit limited use of health services or to be persons with worse healthcare behaviors  
427 than women. Lessons on entry strategies for self-testing may, therefore, be learned from the  
428 introduction of HIV self-testing that specifically targeted men (19).

429 Our study has some strengths and limitations that should be considered. The informants were  
430 recruited from both urban and rural areas of Nigeria, and diversity regarding gender identities,  
431 location of work, and socio-professional profiles was ensured. However, this was a qualitative study,  
432 and the informants' insights may not be representative of all possible opinions in the country. Our  
433 findings offered themes and insights that might be characteristic of the specific groups represented in  
434 our sample. Additionally, some data collection encounters were carried out via Zoom<sup>®</sup>. The content  
435 of interviews conducted online and in-person was similar; however, the interviewers felt that it was  
436 easier to build rapport with the interviewees when partaking in face-to-face encounters. The  
437 possibility that informants interviewed via Zoom<sup>®</sup> changed their narratives due to privacy or  
438 confidentiality concerns cannot be disregarded.

439 In conclusion, facilitating the adoption and use of self-testing in Nigeria will require multiple layers  
440 of planning, ranging from the active engagement of policymakers to develop regulations and  
441 strategies for the rollout of a national self-testing program, to capacity-building of health institutions  
442 to manage the increased demand that may result from the rollout, and to the active engagement of  
443 communities and community decision-making platforms to allay fears and to support and promote  
444 the effective use of self-testing. While the public may perceive that access to SARS-CoV-2 self-  
445 testing will be beneficial in the long-term, the structures and systems in health care institutions must  
446 be prepared to provide appropriate psychosocial and clinical support to self-testers. For a populous  
447 country like Nigeria, where COVID-19 vaccine coverage remains low and the risk of further  
448 epidemic waves of COVID-19 is looming, self-testing holds promise for allowing communities  
449 themselves to promptly detect cases and contribute to halting the spread of the virus in the region.

#### 450 **4 Conflict of Interest**

451 The authors declare that this research was conducted in the absence of any commercial or financial  
452 relationships that could be construed as a potential conflict of interest.

#### 453 **5 Author Contributions**

454 GZMP, SS, and EIR developed the initial research project. MOF adapted the research protocol and  
455 led the implementation of the study in Nigeria. VAU, OA, and MOF performed the data processing  
456 and analyses. VAU, GZMP, SS, and MOF wrote the manuscript. All authors have reviewed the final  
457 version of the manuscript.

#### 458 **6 Funding**

459 This work was funded by the Government of Germany. The funders played no role in the study  
460 design; in the collection, management, analysis, or interpretation of the data; in writing the report; or  
461 in the decision to submit the report for publication.

#### 462 **7 Acknowledgments**

463 The authors are greatly indebted to all informants who agreed to participate in this study and to share  
464 their insights with us. This article has been submitted as a pre-print on medRxiv.

## 465 8 References

- 466 1. World Health Organization. Coronavirus disease (COVID-19) pandemic Geneva: World  
467 Health Organization; 2021 [Available from: [https://www.who.int/emergencies/diseases/novel-  
470 coronavirus-2019?adgroupsurvey={adgroupsurvey}&gclid=Cj0KCQiA-  
471 eeMBhCpARIsAAZfxZAJ4dAylz4XOhRsUIEvbd7w347fha9E4SKI8GW3Ix8jZArMQOckhwgaAp  
472 ItEALw\\_wcB](https://www.who.int/emergencies/diseases/novel-coronavirus-2019?adgroupsurvey={adgroupsurvey}&gclid=Cj0KCQiA-<br/>468 eeMBhCpARIsAAZfxZAJ4dAylz4XOhRsUIEvbd7w347fha9E4SKI8GW3Ix8jZArMQOckhwgaAp<br/>469 ItEALw_wcB)].
- 471 2. CDC. Science Brief: COVID-19 Vaccines and Vaccination 2021 [Available from:  
472 <https://www.cdc.gov/coronavirus/2019-ncov/science/science-briefs/fully-vaccinated-people.html>].
- 473 3. World Health Organization. WHO Director-General's opening remarks at the media briefing  
474 on COVID-19 – 11 March 2020 Geneva: World Health Organization; 2020 [Available from:  
475 [https://www.who.int/director-general/speeches/detail/who-director-general-s-opening-remarks-at-the-  
477 media-briefing-on-covid-19---11-march-2020](https://www.who.int/director-general/speeches/detail/who-director-general-s-opening-remarks-at-the-<br/>476 media-briefing-on-covid-19---11-march-2020)].
- 477 4. Yüce M, Filiztekin E, Özkaya KG. COVID-19 diagnosis -A review of current methods.  
478 *Biosens Bioelectron.* 2021;172:112752.
- 479 5. Giri AK, Rana DR. Charting the challenges behind the testing of COVID-19 in developing  
480 countries: Nepal as a case study. *Biosafety and Health.* 2020;2(2):53-6.
- 481 6. Oran DP, Topol EJ. Prevalence of Asymptomatic SARS-CoV-2 Infection : A Narrative  
482 Review. *Ann Intern Med.* 2020;173(5):362-7.
- 483 7. Hengel B, Causer L, Matthews S, Smith K, Andrewartha K, Badman S, et al. A decentralised  
484 point-of-care testing model to address inequities in the COVID-19 response. *Lancet Infect Dis.*  
485 2021;21(7):e183-e90.
- 486 8. Self-testing.gov.gr. Οδηγίες προς τους Πολίτες 2021 [Available from: [https://self-  
488 testing.gov.gr/](https://self-<br/>487 testing.gov.gr/)].
- 488 9. U.S. Food and Drug Administration. Coronavirus (COVID-19) Update: FDA Authorizes  
489 Antigen Test as First Over-the-Counter Fully At-Home Diagnostic Test for COVID-19 2020  
490 [Available from: [https://www.fda.gov/news-events/press-announcements/coronavirus-covid-19-  
492 update-fda-authorizes-antigen-test-first-over-counter-fully-home-diagnostic](https://www.fda.gov/news-events/press-announcements/coronavirus-covid-19-<br/>491 update-fda-authorizes-antigen-test-first-over-counter-fully-home-diagnostic)].
- 492 10. Indian Council of Medical Research. COVID-19 Home Testing using Rapid Antigen Tests  
493 (RATs) Indian Council of Medical Research; 2021 [Available from:  
494 [https://www.icmr.gov.in/pdf/covid/kits/COVID\\_Home\\_Test\\_Kit\\_06012022.pdf](https://www.icmr.gov.in/pdf/covid/kits/COVID_Home_Test_Kit_06012022.pdf)].
- 495 11. Ibitoye M, Frasca T, Giguere R, Carballo-Diéguez A. Home testing past, present and future:  
496 lessons learned and implications for HIV home tests. *AIDS Behav.* 2014;18(5):933-49.
- 497 12. Kabaghe AN, Visser BJ, Spijker R, Phiri KS, Grobusch MP, van Vugt M. Health workers'  
498 compliance to rapid diagnostic tests (RDTs) to guide malaria treatment: a systematic review and  
499 meta-analysis. *Malar J.* 2016;15:163.
- 500 13. Sy TRL, Padmawati RS, Baja ES, Ahmad RA. Acceptability and feasibility of delegating  
501 HIV counseling and testing for TB patients to community health workers in the Philippines: a mixed  
502 methods study. *BMC Public Health.* 2019;19(1):185.
- 503 14. Kpokiri EE, Marley G, Tang W, Fongwen N, Wu D, Berendes S, et al. Diagnostic Infectious  
504 Diseases Testing Outside Clinics: A Global Systematic Review and Meta-analysis. *Open Forum  
505 Infect Dis.* 2020;7(10):ofaa360.

- 506 15. Wang C, Cheng W, Li C, Tang W, Ong JJ, Smith MK, et al. Syphilis Self-testing: A  
507 Nationwide Pragmatic Study Among Men Who Have Sex With Men in China. *Clin Infect Dis*.  
508 2020;70(10):2178-86.
- 509 16. World Health Organization. Recommendations and guidance on hepatitis C virus self-testing:  
510 web annex D: values and preferences on hepatitis C virus self-testing. Geneva: World Health  
511 Organization; 2021 2021.
- 512 17. Nguyen LT, Nguyen VTT, Le Ai KA, Truong MB, Tran TTM, Jamil MS, et al. Acceptability  
513 and Usability of HCV Self-Testing in High Risk Populations in Vietnam. *Diagnostics (Basel)*.  
514 2021;11(2).
- 515 18. Osayomi T, Adeleke R, Taiwo OJ, Gbadegesin AS, Fatayo OC, Akpoterai LE, et al. Cross-  
516 national variations in COVID-19 outbreak in West Africa: Where does Nigeria stand in the  
517 pandemic? *Spatial Information Research*. 2020:1-9.
- 518 19. Hamilton A, Thompson N, Choko AT, Hlongwa M, Jolly P, Korte JE, et al. HIV Self-Testing  
519 Uptake and Intervention Strategies Among Men in Sub-Saharan Africa: A Systematic Review. *Front*  
520 *Public Health*. 2021;9:594298.
- 521 20. Iliyasu Z, Kassim RB, Iliyasu BZ, Amole TG, Nass NS, Marryshow SE, et al. Acceptability  
522 and correlates of HIV self-testing among university students in northern Nigeria. *Int J STD AIDS*.  
523 2020;31(9):820-31.
- 524 21. Brown B, Folayan MO, Imosili A, Durueke F, Amuamuziam A. HIV self-testing in Nigeria:  
525 public opinions and perspectives. *Glob Public Health*. 2015;10(3):354-65.
- 526 22. Population Council. Feasibility and acceptability of HIV self-testing among men who have  
527 sex with men in Nigeria 2018 [Available from:  
528 [https://www.popcouncil.org/uploads/pdfs/2018HIV\\_SelfTestingMSMNigeria.pdf](https://www.popcouncil.org/uploads/pdfs/2018HIV_SelfTestingMSMNigeria.pdf)].
- 529 23. Jegede AS, Oshiname FO, Sanou AK, Nsungwa-Sabiiti J, Ajayi IO, Siribié M, et al.  
530 Assessing Acceptability of a Diagnostic and Malaria Treatment Package Delivered by Community  
531 Health Workers in Malaria-Endemic Settings of Burkina Faso, Nigeria, and Uganda. *Clin Infect Dis*.  
532 2016;63(suppl 5):S306-s11.
- 533 24. Al-Mustapha AI, Tijani AA, Oyewo M, Ibrahim A, Elelu N, Ogundijo OA, et al. Nigeria's  
534 race to zero COVID-19 cases: True disease burden or testing failure? *J Glob Health*. 2021;11:03094.
- 535 25. World Health Organization. Social stigma threatens COVID-19 response but patients heal  
536 faster with everyone's support Geneva: World Health Organization; 2020 [Available from:  
537 [https://www.afro.who.int/news/social-stigma-threatens-covid-19-response-patients-heal-faster-](https://www.afro.who.int/news/social-stigma-threatens-covid-19-response-patients-heal-faster-everyones-support)  
538 [everyones-support](https://www.afro.who.int/news/social-stigma-threatens-covid-19-response-patients-heal-faster-everyones-support)].
- 539 26. Shilton S, Ivanova Reipold E, Roca Álvarez A, Martínez-Pérez GZ. Assessing Values and  
540 Preferences Toward SARS-CoV-2 Self-testing Among the General Population and Their  
541 Representatives, Health Care Personnel, and Decision-Makers: Protocol for a Multicountry Mixed  
542 Methods Study. *JMIR Res Protoc*. 2021;10(11):e33088.
- 543 27. Ahonkhai AA, Regan S, Idigbe I, Adeniyi O, Aliyu MH, Okonkwo P, et al. The impact of  
544 user fees on uptake of HIV services and adherence to HIV treatment: Findings from a large HIV  
545 program in Nigeria. *PLoS One*. 2020;15(10):e0238720.
- 546 28. Ofoli JNT, Ashau-Oladipo T, Hati SS, Ati L, Ede V. Preventive healthcare uptake in private  
547 hospitals in Nigeria: a cross-sectional survey (Nisa premier hospital). *BMC Health Serv Res*.  
548 2020;20(1):273.

## Values of COVID-19 Self-testing in Nigeria

- 549 29. Yamanis TJ, Dervisevic E, Mulawa M, Conserve DF, Barrington C, Kajula LJ, et al. Social  
 550 Network Influence on HIV Testing Among Urban Men in Tanzania. *AIDS Behav.* 2017;21(4):1171-  
 551 82.
- 552 30. Kwaghe AV, Ilesanmi OS, Amede PO, Okediran JO, Utulu R, Balogun MS. Stigmatization,  
 553 psychological and emotional trauma among frontline health care workers treated for COVID-19 in  
 554 Lagos State, Nigeria: a qualitative study. *BMC Health Serv Res.* 2021;21(1):855.
- 555 31. Olu-Owolabi FE, Amoo E, Samuel O, Oyeyemi A, Adejumo G. Female-dominated informal  
 556 labour sector and family (in) stability: The interface between reproduction and production. *Cogent*  
 557 *Arts & Humanities.* 2020;7(1):1788878.
- 558 32. Aduh U, Folayan MO, Afe A, Onyeaghala AA, Ajayi IO, Coker M, et al. Risk perception,  
 559 public health interventions, and Covid-19 pandemic control in sub-saharan Africa. *Journal of Public*  
 560 *Health in Africa.* 2020.

561

### *Supplementary Material*

**Table 1: Participants' characteristics**

562

| Population                                     | Encounter | Location | Sex/Gender | Age                                    | Education/Sector Profile                |
|------------------------------------------------|-----------|----------|------------|----------------------------------------|-----------------------------------------|
| Representatives of Civil Society groups (RCSs) | IDI 1     | Rural    | Female     | 60s                                    | Tertiary, NGO (HIV/TB/COVID-19)         |
|                                                | IDI 2     | Rural    | Male       | 40s                                    | Tertiary, NGO (HIV/TB)                  |
|                                                | IDI 3     | Rural    | Male       | 40s                                    | Tertiary, News Media                    |
|                                                | IDI 4     | Rural    | Male       | 50s                                    | Tertiary, Trade Union                   |
|                                                | IDI 5     | Rural    | Female     | 40s                                    | Tertiary, Entrepreneur (Poultry)        |
|                                                | IDI 6     | Urban    | Male       | 40s                                    | Tertiary, NGO (Health, general)         |
|                                                | IDI 7     | Urban    | Female     | 80s                                    | Primary, Religious leader (Christian)   |
|                                                | IDI 8     | Urban    | Female     | 50s+                                   | Tertiary, NGO (Children, Women welfare) |
|                                                | IDI 9     | Urban    | Male       | 50s                                    | Tertiary, NGO (Cancer)                  |
|                                                | IDI 10    | Urban    | Female     | 50s                                    | Tertiary, Education (Primary School)    |
|                                                | FGD 1     | Rural    | Male       | 30s                                    | Tertiary, Industry (Vineyard)           |
|                                                |           | Rural    | Male       | 40s                                    | Tertiary, NGO (Health, general)         |
|                                                |           | Rural    | Female     | 60s                                    | Tertiary, NGO (HIV)                     |
|                                                |           | Rural    | Female     | 50s                                    | Secondary, Traditional (Mentor Mother)  |
|                                                |           | Rural    | Female     | 50s                                    | Tertiary, NGO (Children welfare)        |
|                                                | FGD 2     | Urban    | Male       | 30s                                    | Tertiary, NGO (TB)                      |
| Urban                                          |           | Male     | 60s        | Tertiary, NGO (HIV)                    |                                         |
| Urban                                          |           | Male     | 30s        | Tertiary, NGO (Youth welfare)          |                                         |
| Urban                                          |           | Female   | 80s        | Primary, Traditional (Women leader)    |                                         |
| Urban                                          |           | Female   | 40s        | Tertiary, Religious entity (Christian) |                                         |
| Health Care Workers (HCWs)                     | IDI 11    | Rural    | Female     | 40s                                    | Tertiary, Public Health Worker          |
|                                                | IDI 12    | Rural    | Female     | 40s                                    | Tertiary, Community Health Officer      |
|                                                | IDI 13    | Rural    | Female     | 40s                                    | Tertiary, Community Health Officer      |
|                                                | IDI 14    | Rural    | Male       | 40s                                    | Tertiary, Laboratory Technician         |
|                                                | IDI 15    | Rural    | Male       | 50s                                    | Tertiary, Community Health Officer      |
|                                                | IDI 16    | Urban    | Female     | 30s                                    | Tertiary, Nurse                         |

### Values of COVID-19 Self-testing in Nigeria

|                                                                                                                                                                                             |        |       |        |                                   |                                                |
|---------------------------------------------------------------------------------------------------------------------------------------------------------------------------------------------|--------|-------|--------|-----------------------------------|------------------------------------------------|
|                                                                                                                                                                                             | IDI 17 | Urban | Male   | 30s                               | Tertiary, Physician                            |
|                                                                                                                                                                                             | IDI 18 | Urban | Male   | 30s                               | Tertiary, Nurse                                |
|                                                                                                                                                                                             | IDI 19 | Urban | Female | 30s                               | Tertiary, Nurse                                |
|                                                                                                                                                                                             | IDI 20 | Urban | Male   | 30s                               | Tertiary, Nurse                                |
|                                                                                                                                                                                             | FGD 3  | Rural | Female | 30s                               | Tertiary, Community Health Officer             |
|                                                                                                                                                                                             |        | Rural | Male   | 40s                               | Tertiary, Health record Technician             |
|                                                                                                                                                                                             |        | Rural | Male   | 40s                               | Tertiary, Community Health Officer             |
|                                                                                                                                                                                             |        | Rural | Male   | 30s                               | Tertiary, Community Health Officer             |
|                                                                                                                                                                                             | FGD 4  | Urban | Female | 30s                               | Tertiary, Physician                            |
|                                                                                                                                                                                             |        | Urban | Male   | 30s                               | Tertiary, Physician                            |
|                                                                                                                                                                                             |        | Urban | Female | 30s                               | Tertiary, Community Health Officer             |
|                                                                                                                                                                                             |        | Urban | Male   | 40s                               | Tertiary, Medical Laboratory Scientist         |
|                                                                                                                                                                                             |        | Urban | Female | 40s                               | Tertiary, Nurse                                |
| Potential COVID-19 self-testing implementers (PIs)                                                                                                                                          | IDI 21 | Urban | Female | 40s                               | Tertiary, NGO (Women's health)                 |
|                                                                                                                                                                                             | IDI 22 | Urban | Female | 60s                               | Tertiary, Research (Bioethics Committee)       |
|                                                                                                                                                                                             | IDI 23 | Urban | Male   | 50s                               | Tertiary, Professional Society (Public Health) |
|                                                                                                                                                                                             | IDI 24 | Urban | Female | 50s                               | Tertiary, Health Ministry (Administration)     |
|                                                                                                                                                                                             | IDI 25 | Urban | Female | 40s                               | Tertiary, Education (Nursing)                  |
|                                                                                                                                                                                             | IDI 26 | Rural | Male   | 40s                               | Tertiary, NGO (Disabilities)                   |
|                                                                                                                                                                                             | IDI 27 | Rural | Male   | 20s                               | Tertiary, NGO (HIV)                            |
|                                                                                                                                                                                             | IDI 28 | Rural | Male   | 60s                               | Tertiary, Religious leader (Christian)         |
|                                                                                                                                                                                             | IDI 29 | Rural | Female | 30s                               | Tertiary, NGO (HIV)                            |
|                                                                                                                                                                                             | IDI 30 | Rural | Female | 50s                               | Tertiary, NGO (Health, general)                |
|                                                                                                                                                                                             | FGD 5  | Rural | Male   | 60s                               | Tertiary, Landlords Community                  |
|                                                                                                                                                                                             |        | Rural | Male   | 40s                               | Tertiary, NGO (Disabilities)                   |
|                                                                                                                                                                                             |        | Rural | Female | 30s                               | Tertiary, NGO (Disabilities)                   |
|                                                                                                                                                                                             | FGD 6  | Rural | Female | 20s                               | Tertiary, NGO (Health, general)                |
|                                                                                                                                                                                             |        | Rural | Female | 30s                               | Tertiary, NGO (Youth development)              |
|                                                                                                                                                                                             |        | Urban | Male   | 50s                               | Tertiary, Industry (Health products, patents)  |
|                                                                                                                                                                                             |        | Urban | Female | 50s                               | Tertiary, NGO (Women's health)                 |
|                                                                                                                                                                                             |        | Urban | Male   | 40s                               | Tertiary, Education (Medicine)                 |
|                                                                                                                                                                                             | Urban  | Male  | 30s    | Tertiary, NGO (Youth development) |                                                |
| <p>Acronyms:<br/>                     NGO: Non-governmental organization/Civil society-based organization; HIV: Human Immunodeficiency Virus;<br/>                     TB: Tuberculosis</p> |        |       |        |                                   |                                                |
